# Supplementary material for: Preparation of Uniform Nano Liposomes Using Focused Ultrasonic Technology
Source: MDPI journal article supplement (doi:10.3390/nano13192618), 2023-09-22
Supplement: s1 [file s1]

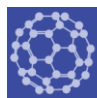

## Article

# Preparation of Uniform Nano Liposomes Using Focused Ultrasonic Technology

Ji-Soo Yun <sup>1,2</sup>, Seon-Ae Hwangbo <sup>1,\*</sup> and Young-Gyu Jeong <sup>2,\*</sup>

<sup>1</sup> Nanosafety Team, Safety Measurement Institute, Korea Research Institute of Standards and Science (KRISS), 267 Gajeong-ro, Yuseong-gu, Daejeon 34113, Republic of Korea; jisoo991208@kriss.re.kr

<sup>2</sup> Department of Applied Organic Materials Engineering, Chungnam National University, Daejeon 34134, Republic of Korea

\* Correspondence: hbsa.kriss@gmail.com (S.-A.H.); ygjeong@cnu.ac.kr (Y.-G.J.)

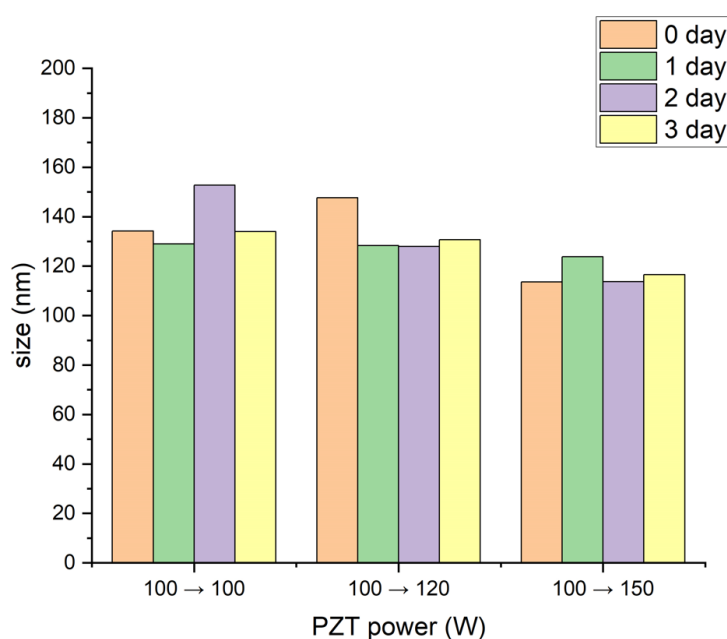

**Figure S1.** Changes in size over 4 d with PZT power (W).
